# Supplementary material for: NS1 DNA vaccination protects against Zika infection through T cell–mediated immunity in immunocompetent mice
Source: PubMed Central journal article supplement — Sci Adv. 2019 Dec 11;5(12):eaax2388. doi: 10.1126/sciadv.aax2388 (PMC6905874; doi:10.1126/sciadv.aax2388), 2019-12-11
Supplement: aax2388_SM.pdf [file aax2388_SM.pdf]

## Supplementary Materials for

### **NS1 DNA vaccination protects against Zika infection through T cell–mediated immunity in immunocompetent mice**

B. Grubor-Bauk\*, D. K. Wijesundara, M. Masavuli, P. Abbink, R. L. Peterson, N. A. Prow, R. A. Larocca, Z. A. Mekonnen, A. Shrestha, N. S. Eyre, M. R. Beard, J. Gummow, J. Carr, S. A. Robertson, J. D. Hayball, D. H. Barouch, E. J. Gowans

\*Corresponding author. Email: [branka.grubor@adelaide.edu.au](mailto:branka.grubor@adelaide.edu.au)

Published 11 December 2019, *Sci. Adv.* **5**, eaax2388 (2019)  
DOI: 10.1126/sciadv.aax2388

#### **This PDF file includes:**

- Fig. S1. DNA vaccine design and antigen expression.
- Fig. S2. FTA analysis.
- Fig. S3. Epitope confirmation.
- Fig. S4. ZIKV viral load over time in T cell–depleted mice.

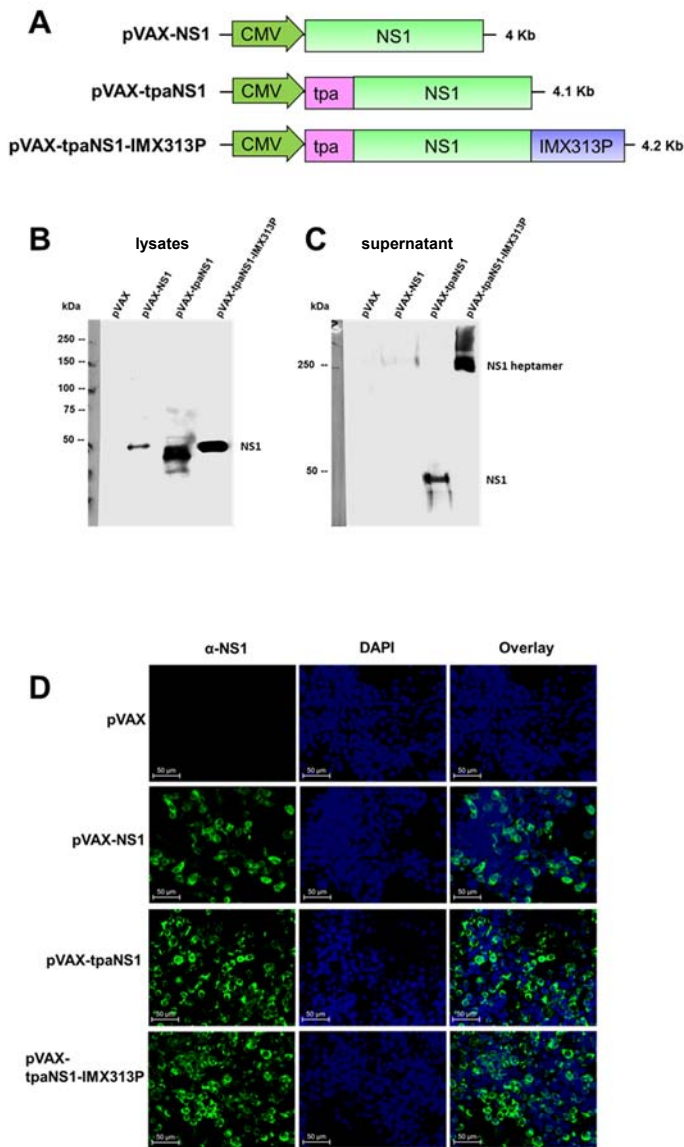

**Fig. S1. DNA vaccine design and antigen expression.** **A)** Schematic diagram of the NS1 DNA plasmid vaccines. **B)** Reducing immunoblot of cell lysates from HEK293T cells transfected with empty pVAX, pVAX-NS1, pVAX-tpaNS1 and pVAX-tpaNS1-IMX313P DNA using anti-ZIKV NS1 antibody. **C)** Non-reducing immunoblot of supernatant fluids from HEK293T cells transfected with pVAX-NS1, pVAX-tpaNS1 and pVAX-tpaNS1-IMX313P plasmid DNA. **D)** Immunofluorescence assay analysis for ZIKV NS1 protein expression in HEK293T cells. Photomicrographs of HEK293T cells transfected with the different DNA vaccines and pVAX control, stained with anti-ZIKV NS1 antibody. DAPI panels show control staining of cell nuclei. Overlay panels are combinations of anti-ZIKV NS1 and DAPI staining patterns.

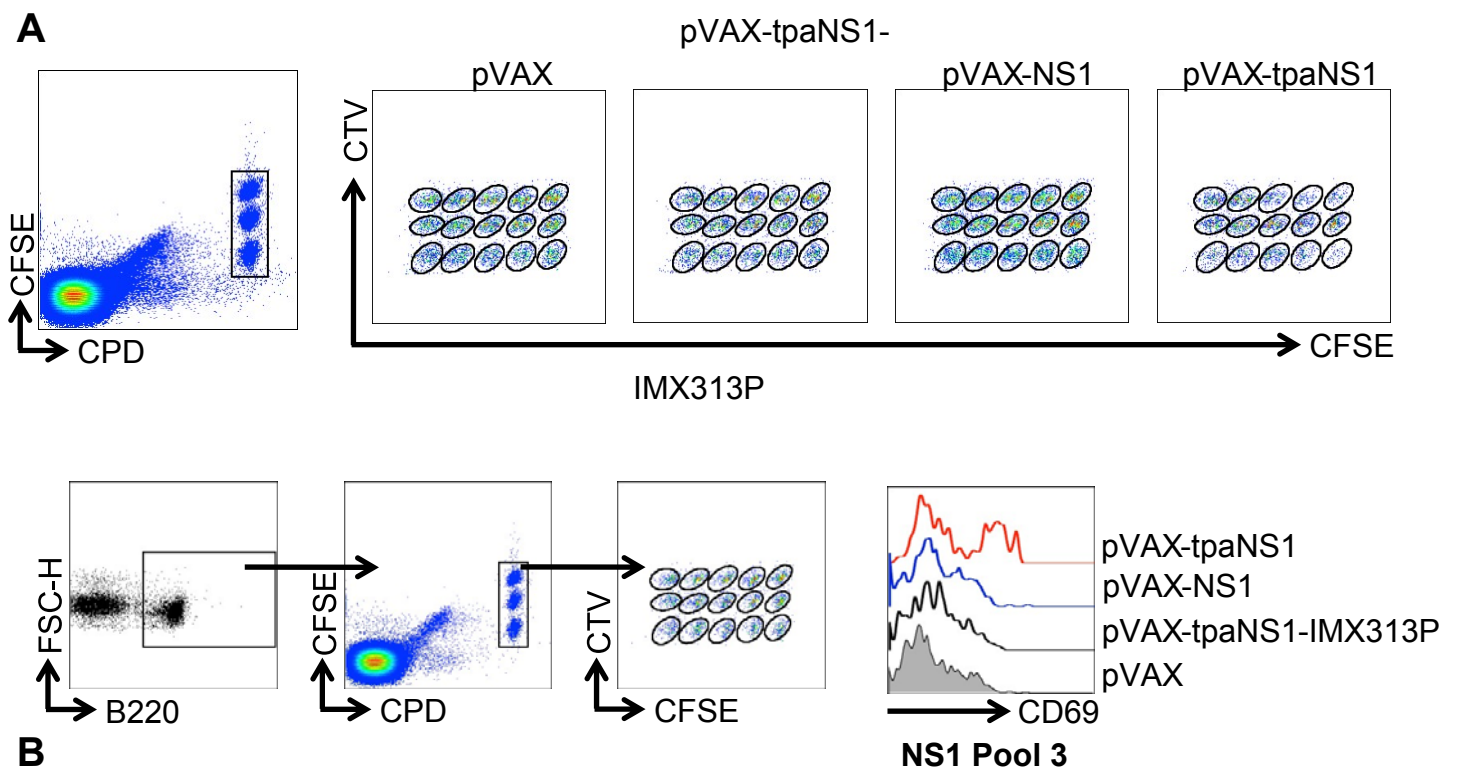

**Fig. S2. FTA analysis.** Flow diagram of the FTA analysis used in experiments described in figures 2, 3 and 4. Cells of interest were gated using FSC-A vs. SSC-A prior to excluding the doublets using FSC-H vs. FSC-W and SSC-H vs. SSC-W. **A)** The NS1 peptide pool targets were gated based on CFSE and CPD emission as shown. For simplicity, the plots show an example in which NS1 targets were gated from a representative mouse for each NS1 DNA vaccine group. The peptides-pulsed cell targets were gated and analysed for the percentage recovery relative to mock targets to determine the specific FTA cell loss using the equation:  $[(\text{percent mock targets} - \text{percent peptides-pulsed targets}) / \text{percent mock targets}] \times 100$ . **B)** For Th cell responses analysis, cells of interest were gated based on B220+ expression. The NS1 peptide pool targets were gated based on CFSE and CPD emission as shown. The geometric mean fluorescent intensity (GMFI) of CD69 on peptide-pulsed targets was determined by flow cytometry. The values plotted in figures 3, 4 and 5 reflect: GMFI of CD69 on peptide-pulsed B220+ targets minus GMFI of CD69 on mock B220+ targets. The representative histogram plot shows CD69 expression on B220+ cell

targets pulsed with 10ug/ml of ZIKV NS1 Pool 3 in representative mice from groups vaccinated with pVAX, pVAX-NS1, pVAX-tpaNS1 and pVAXtpaNS1-IMX313P

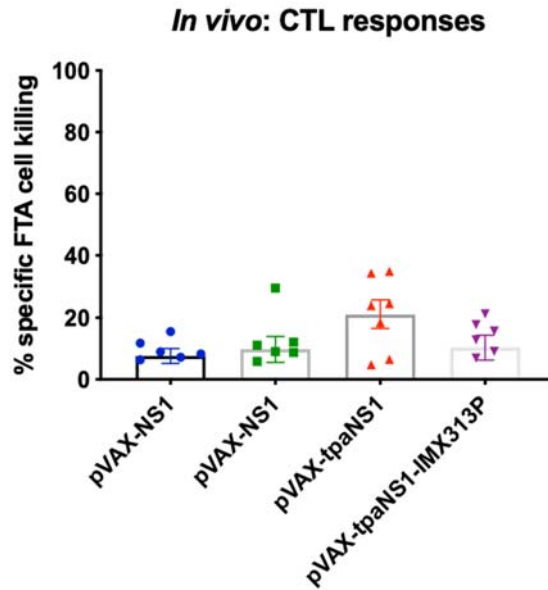

**Fig. S3. Epitope confirmation.** Groups of Balb/c mice (n = 6-7/ group) were vaccinated with NS1 DNA vaccine constructs three times at 2-week intervals and 13 days after the last vaccine dose FTA assay was performed. *In vivo* cell killing was measured against targets pulsed with ZIKV NS1 pool 4 peptides without CTL ID peptides (87 and 88). Peptide pulsed and mock target cells ( $1.5 \times 10^6$  for each target cell cluster) were injected i.v. into vaccinated mice and splenocytes harvested 15h later and analysed by flow cytometry. % specific killing was calculated for the ZIKV NS1 CTL epitopes above mock. Data shows mean +/- SEM of NS1-specific CTL killing.

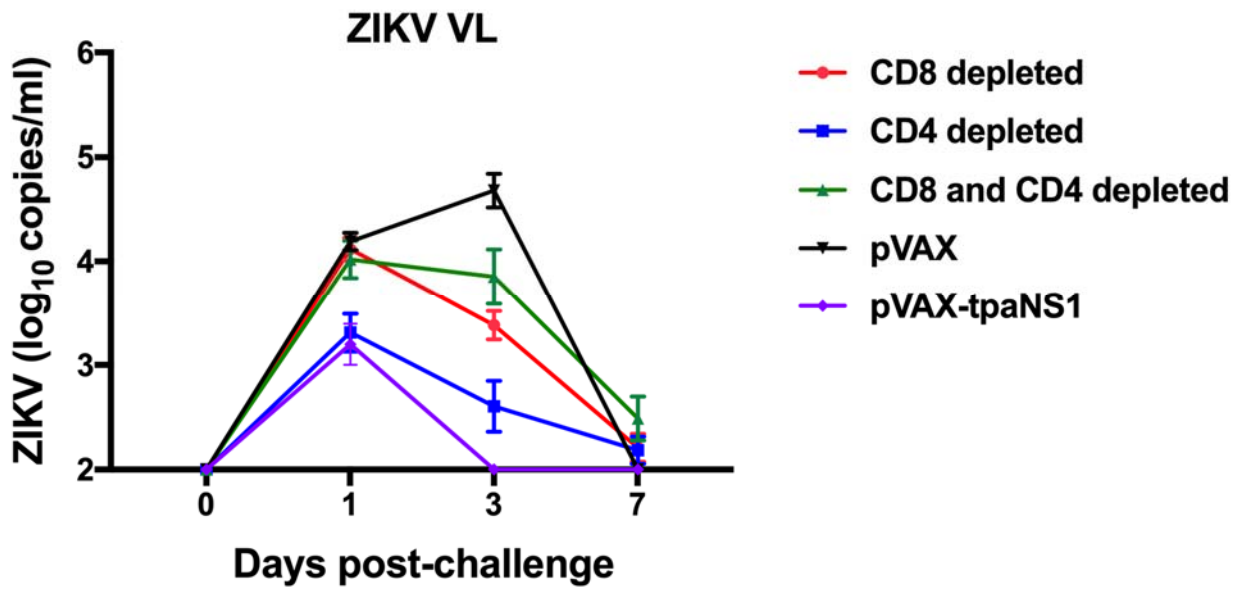

**Fig. S4. ZIKV viral load over time in T cell-depleted mice.** Serum viral loads in pVAX-tpaNS1 DNA vaccinated mice that were undepleted or depleted of CD4<sup>+</sup> and/or CD8<sup>+</sup> T lymphocytes prior to challenge with ZIKV<sub>ZKV2015</sub>. Serum ZIKV viral loads (mean (n=10)  $\pm$  SEM) on days 1, 3 and 7 post challenge are shown. pVAX immunised mice were used as controls.
